# Supplementary material
Source: publisher figshare collection journal article supplement (https://karger.figshare.com/ndownloader/files/40870751)
Supplement: Supplementary file 1 [file 40870751]

Supplementary Table S1. Causes of re-hospitalization

| **Number and causes of Readmissions n, (%)** | **Group 1**  **n=117**  **n (%)** | **Group 2**  **n=158**  **n (%)** | **Group 3**  **n=112**  **n (%)** | **p** |
| --- | --- | --- | --- | --- |
| **Infectious diseases** |  |  |  |  |
| No admissions | **63(53.8)** | **76(48.1)** | **40(35.7)** |  |
| 1 admission | **26(22.2)** | **42(26.6)** | **29(25.9)** | **0.025** |
| 2 admissions | **17(14.5)** | **27(17.1)** | **20(17.9)** |  |
| ≥ 3 admissions | **11(9.4)** | **13(8.2)** | **23(20.5)** |  |
| ≥ 1 CV admissions | 5(4.3) | 8(5.1) | 9(8) | 0.427 |
| ≥ 1 immunological admissions | 7(6) | 12(7.6) | 12(10.7) | 0.406 |
| ≥ 1 metabolic admissions | 3(2.6) | 10(6.3) | 10(8.9) | 0.121 |
| ≥ 1 others admissions | 22(18.8) | 24(15.2) | 17(15.2) | 0.676 |

*n: Absolut number; CV: Cardiovascular*
